# 1 Integrated Use of Compost and Nitrogen Fertilizer and its Effects on 2 Yield and Yield Components of Wheat: A Pot Experiment

3

4 Bayu Dume<sup>1\*</sup>, Gezahegn Berecha<sup>2</sup>, Melkamu Mamuye<sup>3</sup>, Obsu Hirko<sup>4</sup>, Amsalu Nebiyu<sup>2</sup>,  
5 Abebe Nigussie<sup>4</sup>, Aleš Hančl<sup>1</sup>, Pavel Švehla<sup>1</sup>

6 <sup>1</sup>Department of Agro-environmental Chemistry and Plant Nutrition, Faculty of  
7 Agrobiological, Food and Natural Resources, Czech University of Life Sciences Prague,  
8 Czech Republic.

9 <sup>2</sup>Department of Horticulture and Plant Science, College of Agriculture and Veterinary  
10 Medicine, Jimma University, Jimma, Ethiopia.

11 <sup>3</sup>College of Agriculture and Veterinary Medicine-CASCAPE (joint Ethio-Netherlands  
12 project) Jimma University, Jimma, Ethiopia.

13 <sup>4</sup>Departments of Natural Resource Management, College of Agriculture and Veterinary  
14 Medicine, Jimma University, Jimma, Ethiopia. \*[gari@af.czu.cz](mailto:gari@af.czu.cz)

## 15 Abstract

16 There is a research gap and no investigation on combined effects of compost produced  
17 from coffee husk and inorganic nitrogen fertilizer (Urea). The objective of this study  
18 was to evaluate the yield and yield components of wheat (*Triticumaestivum L.*) under  
19 integrated application of compost and nitrogen fertilizer (Urea). A pot experiment in

20 lath house was conducted to determine the effects of integrated uses of compost  
21 produced from coffee husk and nitrogen fertilizer (urea) on yield and yield components  
22 of wheat. The experiment consisted nine treatments: (T1) control(untreated), (T2) 5t ha<sup>-1</sup>  
23 (8.12g pot<sup>-1</sup>) compost, (T3) 10t ha<sup>-1</sup> (16.24g pot<sup>-1</sup>) compost, (T4) 0t ha<sup>-1</sup> compost + 50kg ha<sup>-1</sup>  
24 <sup>1</sup> nitrogen fertilizer(NF) (0.09g pot<sup>-1</sup>), (T5) 5t ha<sup>-1</sup> compost + 50kg ha<sup>-1</sup> NF, (T6) 10t ha<sup>-1</sup>  
25 compost + 50kg ha<sup>-1</sup> NF, (T7) 0t ha<sup>-1</sup> compost + 100kg ha<sup>-1</sup> (0.18g pot<sup>-1</sup>) NF, (T8) 5t ha<sup>-1</sup>  
26 compost + 100kg ha<sup>-1</sup> NF, (T9) 10t ha<sup>-1</sup> compost + 100kg ha<sup>-1</sup> NF and arranged in a  
27 complete randomized design (CRD) with three replications. The compost was prepared  
28 from coffee husk and applied in wet based. The findings showed that compost addition  
29 had little effect on wheat yield and yield components in the absence of nitrogen  
30 fertilizer (Urea). But, at the highest nitrogen fertilizer(urea) dosage rate which is the  
31 recommended field rate(100kg ha<sup>-1</sup>) (equivalent to 0.18g pot<sup>-1</sup>) and the addition of  
32 compost (5t ha<sup>-1</sup>) (equivalent to 8.12g pot<sup>-1</sup>) led to increase in grain yield significantly  
33 (P≤0.05) which is 26 g pot<sup>-1</sup> (equivalent to 14.741t ha<sup>-1</sup>) which is increased the grain  
34 yield by 66.29% compared with control 8.9g pot<sup>-1</sup>( 4.969t ha<sup>-1</sup>) and use of the  
35 recommended rate of nitrogen fertilizer alone 21.98g pot<sup>-1</sup>(12.273t ha<sup>-1</sup>) increased by  
36 16.74%. Spike length and dry matter yield is also significantly (P≤0.05) increased under  
37 the application integrated compost and nitrogen fertilizer(urea).The results of the  
38 experiment revealed that compost based soil management strategies can enhance wheat  
39 production thereby contribute positively to the viability and benefits of agricultural

40 production systems. However, the nutrient-compost interactions should receive special  
41 attention due to the great variability in the properties of compost which may depend on  
42 the type of organic materials used for compost.

43 **Key words:** Compost application, coffee husk, crop production, yield, biomass, nitrogen  
44 fertilizer

## 45 INTRODUCTION

46 In many Sub-Saharan Africa countries, increasing wheat production to encounter  
47 higher demands in growing populations is still a challenge [1, 2]. Ethiopia is one of the  
48 largest wheat producers in Sub-Saharan Africa and has a favourable wheat growing  
49 climatic environment. However, over the past decade, there has been a consistent deficit  
50 in wheat production. The fragmented nature of land holdings and low use of  
51 agricultural inputs particularly, fertilizers contribute to low levels of wheat productivity  
52 in Ethiopia [3]. The country doesn't produce its own fertilizer supply, and farmers use a  
53 common fertilizer diammonium phosphate (DAP) and urea applied at a field  
54 recommended rate of 100 kg ha<sup>-1</sup> each regardless of soil type. Several studies have  
55 reported that inorganic fertilizer applications resulted in increased crop productivity  
56 worldwide. However, the supplementation of the crop area using only two sources of  
57 inorganic fertilizers (DAP and urea) for many years and complete removal of crop  
58 residues from the production land has led to severe nutrient mining in Ethiopia. On the  
59 other hand, the use of compost alone as a substitute to inorganic fertilizer will not be

60 enough to maintain the present levels of crop productivity of high yielding varieties [4].  
61 Therefore, integrated nutrient management in which both compost and inorganic  
62 fertilizers are used simultaneously is the most effective method particularly in  
63 developing countries where the mineral fertilizers are expensive and difficult to afford  
64 the costs. Few previous studies by [5, 6, 7] showed that, wheat productivity could be  
65 enhanced through organic and inorganic fertilizer combinations. Though there are some  
66 trials conducted on the agronomic response of wheat to organic (i.e. farmyard and  
67 green manure) and mineral fertilizer integrations. But, there is no investigation on  
68 combined effects of compost produced from coffee husk and inorganic fertilizer (Urea)  
69 on the yield and yield components of wheat. In Ethiopia 192,000 metric ton of coffee  
70 husk is produced and disposed per year and the study area(Jimma) is commonly  
71 known by coffee production and 134,400 metric ton of coffee husk per year is simply  
72 disposed to the environment [8]. Thus, it is very important to use for agricultural input  
73 by composting and integrating with inorganic fertilizers. Therefore, the objective of this  
74 study was to evaluate the yield and yield components of wheat (*Triticumaestivum L.*)  
75 under integrated application of compost produced from coffee husk and nitrogen  
76 fertilizer (Urea).

77

78

79

## 80 MATERIALS AND METHODS

### 81 Description of the study area

82 This study was conducted in Jimma University College of Agriculture and Veterinary  
83 Medicine, South Western Ethiopia at lath house pot experiment. The study area is  
84 located at Latitude of 7°33'N and Longitude of 36°57'E. The altitude ranges from 1760 to  
85 1920 m above sea level. The mean annual maximum and minimum temperatures are  
86 26.8 and 11.4°C and the relative humidity are 91.4 and 39.92%, respectively. The mean  
87 annual rainfall is 1500 mm and soil is mainly dominated by Nitisols[9].

### 88 Soil sampling and Compost preparation

89 The top 0-30cm composite soil samples were collected. The collected soil samples were  
90 air-dried, crushed by using mortar and pestle and then passed through a 2 mm square-  
91 mesh sieve. Compost derived from coffee husk was prepared in Jimma University  
92 College of Agriculture and Veterinary Medicine (JUCAVM) using pit composting  
93 method.

### 94 Soil and compost analysis

95 pH and electrical conductivity (EC) were measured in distilled water at 1:5(w/v) [10].  
96 OC content was determined by the Walkley-Black method and, OM percent was  
97 obtained by multiplying the percent of soil OC by a factor of 1.724 following the  
98 assumptions that OM is composed of 58% carbon, total N was analyzed using the  
99 Kjeldahl[11]. Available phosphorus (P) was determined by Mehlich 3 method [12]. CEC

100 and exchangeable bases (Ca, Mg, K and Na) were determined after extracting the  
101 samples by (1N NH<sub>4</sub>OAc) at pH 7. Fe was determined by the atomic absorption  
102 spectrometer (AAS) after extracting by the DTPA solution. Ca and Mg in the extracts  
103 were analyzed using AAS, while Na and K were analyzed by flame photometer [11].  
104 Exchangeable acidity of soil was determined by the titration method after the 1N KCl  
105 solution at pH 7 used to leach exchangeable H<sup>+</sup> and Al<sup>3+</sup> from soil sample [13]. The  
106 particle size distribution (texture), of the soil sample, was determined by the Boycouos  
107 hydrometric method [11]. Soil bulk density was determined by the undisturbed core  
108 sampling method after drying the soil samples in an oven at 105°C to constant weights.

### 109 **Pot experimental set up**

110 A pot experiment was carried out at controlled lath house. Plastic pots (33cm top and  
111 20cm bottom diameter) with 30cm height were filled with air-dried soil. The experiment  
112 consisted the following nine treatments:(T1) control ,(T2) 5t ha<sup>-1</sup> (8.12g pot<sup>-1</sup>)  
113 compost,(T3) 10t ha<sup>-1</sup> (16.24g pot<sup>-1</sup>) compost, (T4) 0t ha<sup>-1</sup> compost + 50kg ha<sup>-1</sup>(0.09g pot<sup>-1</sup>)  
114 nitrogen fertilizer(NF), (T5) 5t ha<sup>-1</sup> compost + 50kg ha<sup>-1</sup> NF, (T6) 10t ha<sup>-1</sup> compost + 50kg  
115 ha<sup>-1</sup> NF, (T7) 0t ha<sup>-1</sup> compost + 100kg ha<sup>-1</sup>(0.18g pot<sup>-1</sup>) NF, (T8) 5t ha<sup>-1</sup> compost + 100kg  
116 ha<sup>-1</sup> NF and (T9) 10t ha<sup>-1</sup> compost + 100kg ha<sup>-1</sup> NF. The treatments were arranged in a  
117 complete randomized design (CRD) with three replications. Ten wheat  
118 (*Triticumaestivum L.*) seeds were sown in each pot and thinned to keep five plants per  
119 pot after germination. After emergence, four plants were maintained in each pot until

120 harvesting. Throughout the experiment, plants were regularly watered by distilled  
121 water to maintain field capacity moisture content until the end of the maturity. Plant  
122 height was recorded just before harvesting. The aboveground parts of plants were  
123 harvested at soil level from each pot. Fresh shoots were dried separately at 70°C for  
124 72hrs.

### 125 **Postharvest soil and nutrient uptake analysis**

126 NO<sub>3</sub>-N in plant tissue was determined using 2% acetic acid [14]. Plant K content was  
127 determined by flame photometer after wet digestion with sulphuric acid. Plant P  
128 content was determined photometrically with the molybdenum blue method. At the  
129 end of the experiments (after crop harvest), soil samples were collected from each pot,  
130 air-dried and sieved (<2mm) and selected chemical properties were analyzed by  
131 followed standard procedures [11]. pH and EC of the soil were determined in water  
132 suspension at 1:5 soil: liquid ratio (w/v). Total carbon content was determined by the  
133 Walkley-Black method and, total N was analyzed using the Kjeldahl method [11].

### 134 **Statistical data analysis**

135 Data were subjected to statistical analyses. One-way analysis of variance (ANOVA) was  
136 performed to compare variations in soil properties and plant growth characteristics for  
137 each treatment. For all the analyses, treatment means were separated using the least  
138 significant difference (LSD), and treatment effects were declared significant at the 5%

139 level of probability ( $P \leq 0.05$ ). All analyses were performed using the version 9.3 SAS  
140 package.

141

142 **Table 1. Selected physicochemical properties of experimental soils and compost**

| Parameters                        | Experimental soil Mean $\pm$ SD | Compost(Mean $\pm$ SD) |
|-----------------------------------|---------------------------------|------------------------|
| Bulk density (gmcm <sup>3</sup> ) | 1.04 $\pm$ 0.01                 | -                      |
| pH-H <sub>2</sub> O (1:5)         | 5.2 $\pm$ 0.02                  | 7.6 $\pm$ 0.03         |
| Exch. Acidity(me/100g)            | 4.9 $\pm$ 0.1                   | -                      |
| EC (dS/cm) ( 1:5)                 | 0.02 $\pm$ 0.00                 | 4.32 $\pm$ 0.21        |
| Exch. Ca (me/100g)                | 8.08 $\pm$ 1.32                 | 58.35 $\pm$ 0.52       |
| Exch. Mg (me/100g)                | 1.20 $\pm$ 0.2                  | 6.45 $\pm$ 0.02        |
| Exch. K (me/100g)                 | 0.8 $\pm$ 0.02                  | 1.98 $\pm$ 0.21        |
| Exch. Na (me/100g)                | 0.02 $\pm$ 0.00                 | 3.05 $\pm$ 0..21       |
| Exch. Fe(me/100g)                 | 35.54 $\pm$ 1.12                | -                      |
| Exch. Al(me/100g)                 | 795.00 $\pm$ 0.23               | -                      |
| CEC (me/100g)                     | 24.36 $\pm$ 1.7                 | 68.12 $\pm$ 0.21       |
| Organic Carbon (%)                | 3.97 $\pm$ 0.23                 | 30.80 $\pm$ 6.12       |
| Organic Matter (%)                | 6.85 $\pm$ 0.39                 | 53.10 $\pm$ 1.50       |
| Total Nitrogen (%)                | 0.34 $\pm$ 0.02                 | 1.62 $\pm$ 0.62        |
| Total P(mg/kg)                    | 19.2 $\pm$ 0.14                 | 130.01 $\pm$ 2.25      |
| Available P (mg /kg)              | 4.52 $\pm$ 0.09                 | 14.45 $\pm$ 1.23       |

143

144

145



## 146 RESULTS AND DISCUSSION

### 147 Soil and compost properties

148 Physicochemical properties of the experimental soil and compost are shown in (Table  
149 1). The soil had lower available P, total P, and higher exchangeable Fe and Al. The high  
150 pH values of compost may be due to basic cations such as Ca, Mg, Na, and K, which  
151 were present in compost materials. The CEC of compost was also high which may be  
152 due to high negative charge potential of surface functional groups. OC concentrations  
153 were high in compost. The compost contained high levels of both macro and micro-  
154 nutrient elements. Compost was especially high in basic cations (Ca, Mg, K, Na) and  
155 total P containing concentrations. This results supported by the findings of [15] reported  
156 that compost derived from coffee husk contained high levels of organic matters, micro  
157 and macro nutrients.

### 158 Wheat growth characteristics and yield components

159 Compost addition increased wheat grain production in the absence of the nitrogen  
160 fertilizer (NF), as compared to the control. These increases were clearly lower than those  
161 caused by the use of NF compared to the control soil for the NF without compost  
162 addition, respectively. These results are in agreement with several authors [16,17], who  
163 found little responses of crop yield and nutrient status from the application of compost  
164 alone which are likely due to its nature: a carbon- rich material. Therefore, most of the  
165 studies have shown that the beneficial effects of the addition of compost on crop

166 production are most evident when compost is combined with NF. The detected  
167 increases in nutrient efficiency after amending the soil with compost have been mainly  
168 related to a greater nutrient retention, minimizing nutrient losses, improvements in soil  
169 properties like increase in WHC, decrease in soil compaction, and leading to  
170 immobilization of contaminants or nutrient mobilizations; and enhancement in soil  
171 biological properties such as more favorable root environment, microbial activities  
172 favoring nutrient availability. In this study, a significant compost\*NF interaction was  
173 observed for wheat grain production (Table 3). Thus, the highest wheat grain  
174 productions were obtained by combining both the 5t ha<sup>-1</sup> of compost and 100kg ha<sup>-1</sup> NF  
175 application dosage rates. These represented an increase with respect to the control soil  
176 and with respect to the control soil plus the highest NF for the compost. These results  
177 demonstrated that the compost addition at the 5t ha<sup>-1</sup> application rate increased grain  
178 yield with respect to the individual use of the NF under the presence of recommended  
179 NF. In this experiment conditions, nutrient losses were absent since irrigation was  
180 controlled to avoid leaching, and compost adsorption capacity might have limited  
181 nitrogen availability in the short term, especially after the NF addition. However, under  
182 field conditions, the fact that compost addition can avoid nutrient losses by leaching  
183 may favor an increase in the availability of nutrients in the soil in the long term. The  
184 substantial increase in total C and N contents from the compost treatments suggest that

185 the compost may be useful for building C and N contents in soils, particularly the soils

186 with low levels of inherent C and N.

187 Table 2. Effect of compost applied alone or mixed with NF on the shoot and root

188 characteristics of wheat

| Comp<br>t/ha | NF<br>kg/ha | Shoot<br>length(cm) |                              | Shoot fresh<br>weight(g/plant) |                    | Shoot dry<br>weight(g/plant) |                   | Root<br>length(cm)  |                    |
|--------------|-------------|---------------------|------------------------------|--------------------------------|--------------------|------------------------------|-------------------|---------------------|--------------------|
|              |             | Vegetative<br>stage | Heading<br>stage             | Vegetative<br>stage            | Headin<br>g stage  | Vegetative<br>stage          | Heading<br>stage  | Vegetative<br>stage | Heading<br>stage   |
| 0            | 0           | 40.1 <sup>e</sup>   | 73.1 <sup>d</sup>            | 5.4 <sup>e</sup>               | 6.1 <sup>f</sup>   | 1.19 <sup>d</sup>            | 3.1 <sup>e</sup>  | 10.0 <sup>e</sup>   | 12.1 <sup>e</sup>  |
| 5            | 0           | 55.4 <sup>cd</sup>  | 89 <sup>b</sup> <sup>c</sup> | 16.1 <sup>d</sup>              | 28.2 <sup>e</sup>  | 3.8 <sup>b</sup>             | 16.2 <sup>d</sup> | 18.8 <sup>a</sup>   | 20.0 <sup>ab</sup> |
| 10           | 0           | 54.6 <sup>d</sup>   | 81.3 <sup>cd</sup>           | 12 <sup>d</sup>                | 17.7 <sup>e</sup>  | 1.96 <sup>d</sup>            | 7.1 <sup>e</sup>  | 16.2 <sup>bc</sup>  | 16.1 <sup>d</sup>  |
| 0            | 50          | 53.2 <sup>d</sup>   | 82.1 <sup>cd</sup>           | 7.8 <sup>c</sup>               | 17.1 <sup>d</sup>  | 1.99 <sup>c</sup>            | 6.8 <sup>d</sup>  | 16.5 <sup>bc</sup>  | 18.2 <sup>bc</sup> |
| 5            | 50          | 69.1 <sup>a</sup>   | 87.2 <sup>bc</sup>           | 13.8 <sup>b</sup>              | 21.0 <sup>c</sup>  | 2.10 <sup>c</sup>            | 9.1 <sup>c</sup>  | 14.0 <sup>d</sup>   | 16.1 <sup>cd</sup> |
| 10           | 50          | 50.9 <sup>d</sup>   | 87.1 <sup>bc</sup>           | 13 <sup>b</sup>                | 21.2 <sup>c</sup>  | 2.3 <sup>c</sup>             | 9.0 <sup>c</sup>  | 14.1 <sup>d</sup>   | 19.3 <sup>b</sup>  |
| 0            | 100         | 61.4 <sup>b</sup>   | 92.2 <sup>ab</sup>           | 16.2 <sup>a</sup>              | 25.3 <sup>b</sup>  | 3.40 <sup>ab</sup>           | 11.2 <sup>b</sup> | 15.0 <sup>cd</sup>  | 22.0 <sup>a</sup>  |
| 5            | 100         | 65.2 <sup>bc</sup>  | 97.8 <sup>a</sup>            | 17.3 <sup>a</sup>              | 30.1 <sup>a</sup>  | 3.81 <sup>a</sup>            | 15.1 <sup>a</sup> | 17.2 <sup>ab</sup>  | 18.3 <sup>cd</sup> |
| 10           | 100         | 61.6 <sup>b</sup>   | 85.4 <sup>bc</sup>           | 14.2 <sup>b</sup>              | 28.5 <sup>ab</sup> | 3.78 <sup>a</sup>            | 12.4 <sup>b</sup> | 16.1 <sup>bc</sup>  | 16.8 <sup>cd</sup> |
| Comp         |             | ns                  | ns                           | ns                             | ns                 | ns                           | ns                | *                   | ns                 |
| NF           |             | ns                  | ns                           | **                             | ns                 | ns                           | ns                | ns                  | *                  |
| comp*        |             | **                  | **                           | **                             | **                 | *                            | **                | ns                  | ns                 |
| NF           |             |                     |                              |                                |                    |                              |                   |                     |                    |

189 ns= non-significant, \*\*P < 0.01, \*P < 0.05, Comp=compost, NF= nitrogen fertilizer

190

191 Result on growth parameters of wheat are influenced by different integrations of coffee

192 husk compost and nitrogen fertilizer (urea) (Table 2) indicated that significantly highest

193 shoot length at heading stage was recorded, when the nitrogen fertilizer (urea)  
 194 application was applied at a recommended rate (100kg ha<sup>-1</sup>) together with 5t ha<sup>-1</sup> of  
 195 compost and the lowest was recorded from the treatments with no nitrogen fertilizer  
 196 applications. This implies that wheat growth might be retarded if wheat cultivation was  
 197 not supplemented with mineral fertilizers regardless of the compost applications.

198 Table 3. Effect of compost alone and mixed with NF on yield and yield characteristics of  
 199 wheat grown

| Comp<br>rate(t/ha) | NF rate<br>(kg/ha) | Spike<br>length(cm) | No.of<br>grains/<br>spike | 1000grains<br>weight(gm) | DMY<br>(g/pot)     | Grain<br>Yield(g/pot) |
|--------------------|--------------------|---------------------|---------------------------|--------------------------|--------------------|-----------------------|
| 0                  | 0                  | 4.5 <sup>c</sup>    | 20 <sup>e</sup>           | 46.9 <sup>d</sup>        | 10.8 <sup>e</sup>  | 8.9 <sup>g</sup>      |
| 5                  | 0                  | 7.8 <sup>b</sup>    | 48 <sup>a</sup>           | 57.2 <sup>abc</sup>      | 31.6 <sup>b</sup>  | 21.5 <sup>bc</sup>    |
| 10                 | 0                  | 6.9 <sup>bc</sup>   | 29 <sup>d</sup>           | 60.1 <sup>bc</sup>       | 17.1 <sup>d</sup>  | 12.6 <sup>f</sup>     |
| 0                  | 50                 | 10.1 <sup>a</sup>   | 46 <sup>ab</sup>          | 53.8 <sup>c</sup>        | 18.6 <sup>d</sup>  | 13.9 <sup>e</sup>     |
| 5                  | 50                 | 9.8 <sup>a</sup>    | 42 <sup>bc</sup>          | 55.2 <sup>abc</sup>      | 28.3 <sup>bc</sup> | 19.2 <sup>cd</sup>    |
| 10                 | 50                 | 10.4 <sup>a</sup>   | 40 <sup>c</sup>           | 58.6 <sup>abc</sup>      | 24.1 <sup>c</sup>  | 17.1 <sup>d</sup>     |
| 0                  | 100                | 10.2 <sup>a</sup>   | 45 <sup>ab</sup>          | 61.4 <sup>a</sup>        | 25.9 <sup>c</sup>  | 21.9 <sup>8bc</sup>   |
| 5                  | 100                | 12.2 <sup>a</sup>   | 52 <sup>a</sup>           | 57.2 <sup>abc</sup>      | 38.4 <sup>a</sup>  | 26.4 <sup>a</sup>     |
| 10                 | 100                | 12.3 <sup>a</sup>   | 46 <sup>ab</sup>          | 59.1 <sup>ab</sup>       | 26.8 <sup>c</sup>  | 22.4 <sup>b</sup>     |
| comp               |                    | ns                  | *                         | ns                       | ns                 | ns                    |
| NF                 |                    | *                   | ns                        | *                        | ns                 | ns                    |
| Comp * NF          |                    | *                   | *                         | *                        | *                  | *                     |

200 ns=non-significant,\*P < 0.05.comp=compost, DMY= Dry mass yield

201 The higher spike length (12.3 cm) was observed when wheat is cultivated under 100 kg  
202 ha<sup>-1</sup> nitrogen fertilizer combined with 10t ha<sup>-1</sup> compost with no significance difference  
203 with the treatments that receive 50 kg ha<sup>-1</sup> of nitrogen fertilizer and 5 t ha<sup>-1</sup> compost  
204 (12.2cm). Generally, 50-100 kg ha<sup>-1</sup> nitrogen fertilizer and 5-10 t ha<sup>-1</sup> compost  
205 combinations give significantly higher spike length and number of grain per spike.  
206 However, lower spike length was recorded when with no nitrogen fertilizer  
207 combination with compost. Similarly, dry matter yield was significantly influenced by  
208 the different combinations of nutrient sources and rates. Highest result (38.4g pot<sup>-1</sup>) was  
209 observed with the combined application of 5t ha<sup>-1</sup> compost and 100kg ha<sup>-1</sup> nitrogen  
210 fertilizer and the lower result (10.8g plot<sup>-1</sup>) was recorded from the control treatment (no  
211 compost and/or nitrogen fertilizer application). Fertilizer combinations significantly  
212 influence the other yield and yield components such as, thousand seed weight, grain  
213 yield and dry matter yield (Table 3). Thousand seed weight showed significant  
214 variation across treatments. The highest (61.4gm) was recorded when 100kg ha<sup>-1</sup>  
215 nitrogen fertilizer alone was applied. Similar results were reported by different  
216 researchers, Kaur, Sarwar, Rasool and Brar[18- 21]. Lower results were observed alone  
217 with no nitrogen fertilizer integrations indicating that, unless it is integrated with  
218 inorganic fertilizers, the use of compost alone may not fully satisfy crop nutrient  
219 demand, especially in the year of application [22]. Grain yield was more than three  
220 times higher when wheat was cultivated under 100 kg ha<sup>-1</sup> nitrogen fertilizer and 5t ha<sup>-1</sup>

221 compost compared to wheat cultivated with no fertilizer application (control). This  
222 might be due to the soil from study area was poor in soil fertility.

### 223 **Plant nutrient concentration**

224 The compost application significantly increased the shoot concentrations of K and P,  
225 and significantly decreased the concentrations of N, Ca, Mg, Cu, Mn and Zn (Table 4).  
226 Sulfur concentration in the shoot was not affected by the compost application; however,  
227 there was a significant ( $P \leq 0.05$ ) increase in its concentration with the NF application.  
228 The interactive effects of NF and compost treatments were non-significant in relation to  
229 the concentrations of all nutrient elements (Table 4).

### 230 **Plant nutrient uptake**

231 Shoot uptake data and associated statistical analyses for various nutrients are presented  
232 in Table 4. The shoot uptake of all nutrients, except Ca and Mg, increased significantly  
233 with the application of compost (Table 4). The uptake of Ca, and Mg remained similar  
234 or slightly increased in response to the compost treatments. Fertilizer's application had  
235 a significantly positive effect on the uptake of nutrients, except for Ca, Mg, Mn, and Fe,  
236 where the effect was not significant (Table 4). Plant uptake of almost all macro and  
237 micro-nutrients increased with increasing compost rating and the decrease of nutrient  
238 concentration in shoots was most directly related to the increased shoot dry matter  
239 yield of plants (dilution effect) in compost treated soil. Decreased concentration of some  
240 of the nutrients, however, could be due to their adsorption onto Fe and Al oxides

241 present in the acidic soil. Iron and Al oxides are known to have high adsorption  
 242 capacity for phosphate, and metallic cations like Cu, Zn, Mn, Mg and Ca.  
 243 Table 4 Concentrations of macro- and micro-nutrients in wheat shoots grown as  
 244 affected by different application rates of compost and NF

| Comp<br>rate(t/ha) | NF<br>(kg/ha) | (g kg <sup>-1</sup> ) |      |      |     |     | (mg kg <sup>-1</sup> ) |     |    |     |     |
|--------------------|---------------|-----------------------|------|------|-----|-----|------------------------|-----|----|-----|-----|
|                    |               | N                     | P    | K    | S   | Ca  | Mg                     | Cu  | Zn | Mn  | Fe  |
| 0                  | 0             | 30.05                 | 0.86 | 11.1 | 1.6 | 5.9 | 4.8                    | 3.6 | 46 | 62  | 70  |
| 5                  | 0             | 22.35                 | 0.87 | 16.0 | 1.6 | 4.1 | 2.6                    | 2.9 | 34 | 37  | 97  |
| 10                 | 0             | 17.25                 | 0.86 | 19.4 | 1.4 | 2.7 | 1.9                    | 3.6 | 32 | 47  | 82  |
| 0                  | 50            | 29.4                  | 0.87 | 13.1 | 1.7 | 7.2 | 4.6                    | 4.8 | 56 | 72  | 165 |
| 5                  | 50            | 23.3                  | 0.83 | 18.2 | 1.5 | 3.5 | 2.3                    | 3.1 | 33 | 44  | 86  |
| 10                 | 50            | 21.05                 | 0.94 | 19.6 | 1.6 | 2.9 | 1.8                    | 2.8 | 30 | 42  | 85  |
| 0                  | 100           | 29.45                 | 0.77 | 17.6 | 1.5 | 5.6 | 3.1                    | 4.6 | 47 | 54  | 115 |
| 5                  | 100           | 24.05                 | 0.85 | 19.1 | 1.5 | 3.6 | 2.2                    | 3.0 | 36 | 38  | 106 |
| 10                 | 100           | 23.2                  | 0.98 | 25.2 | 1.4 | 2.9 | 1.9                    | 3.1 | 40 | 47  | 87  |
| comp rate          |               | ***                   | *    | **   | ns  | *** | ***                    | *** | ** | *** | ns  |
| NF rate            |               | ns                    | ns   | *    | *   | ns  | *                      | ns  | ns | ns  | ns  |
| Comp * NF          |               | ns                    | ns   | ns   | ns  | ns  | ns                     | ns  | ns | ns  | ns  |

245 ns, non-significant. \*\*\*P < 0.001, \*\*P < 0.01, \*P < 0.05, TC, Total carbon, TN, Total nitrogen

## 246 **Changes in post-harvest soil properties**

247 At the end of the experiments (after crop harvest), composite soil samples were  
 248 collected and analyzed. Compost had much influence on soil properties, which can  
 249 explain its effects on plant growth and grain production. The application of compost at

250 an increasing rate significantly increased the pH, EC, TC and TN (Table 5). Total C and  
251 N contents were increased significantly with the compost treatments, the increase in soil  
252 C was substantially greater (Table 5) and the fertilizer treatment significantly increased  
253 total N content. The application of compost has been reported to significantly increase  
254 soil total C relative to the control. Compost soil-interaction may enhance soil C storage  
255 via processes of organic matter sorption to compost [18]. The coffee husk compost offers  
256 greater potential as a soil amendment, which has potential supplies of nutrients. The  
257 increased soil pH with compost addition might have increased the adsorption capacity  
258 of metallic cations. Compost had much influence on soil properties, which can explain  
259 its effects on plant growth and grain production. The results of this study highlighted  
260 significant improvement in the soil amended with compost alone while the growth and  
261 yield components of both crops supplemented with compost and NF were higher than  
262 the highest N rate applied, displaying the fertilizer value of mixed treatments.

263

264

265

266

267

268

269



270

271 Table 5: Effects of compost and fertilizer treatments on pH, EC, total C and total N

272 measured after the plant harvest

| Comp rate(t/ha) | Fert rate (kg/ha) | pH-1:5H <sub>2</sub> O | EC(1:5) dS/cm | TC(g kg <sup>-1</sup> ) | TN (g kg <sup>-1</sup> ) |
|-----------------|-------------------|------------------------|---------------|-------------------------|--------------------------|
| 0               | 0                 | 5.20                   | 0.164         | 316.12                  | 34.25                    |
| 5               | 0                 | 5.46                   | 0.336         | 319.20                  | 34.15                    |
| 10              | 0                 | 5.96                   | 0.626         | 436.40                  | 35.30                    |
| 0               | 50                | 5.11                   | 0.188         | 316.21                  | 34.23                    |
| 5               | 50                | 5.45                   | 0.409         | 439.15                  | 35.26                    |
| 10              | 50                | 5.83                   | 0.996         | 468.10                  | 38.60                    |
| 0               | 100               | 5.24                   | 0.250         | 429.30                  | 35.17                    |
| 5               | 100               | 5.42                   | 0.389         | 430.22                  | 35.28                    |
| 10              | 100               | 6.15                   | 1.052         | 462.14                  | 38.70                    |
| comp rate       |                   | ***                    | ***           | ***                     | ***                      |
| NF rate         |                   | *                      | ***           | **                      | *                        |
| Comp x NF       |                   | ns                     | ***           | ns                      | ns                       |

273 ns, non-significant, \*\*\*P < 0.001. \*\*P < 0.01. \*P < 0.05, comp, compost, NF, Nitrogen fertilizer

274 While the lath house experiment is a good starting point for evaluating plant response

275 under ideal conditions; the true agronomic potential of the coffee husk compost needs

276 to be assessed by measuring crop responses to the coffee husk compost under field

277 conditions. Therefore, use of integrated compost and nitrogen fertilizer is a feasible

278 approach to overcome soil fertility constraints. Additionally, integrated use of nitrogen  
279 fertilizers along with compost may improve the efficiency of the mineral fertilizer.

## 280 **Acknowledgment**

281 Financial support for this work was provided by the Capacity building for Scaling up of  
282 evidence-based best practices in Agricultural Production in Ethiopia (CASCAPE)  
283 project, Jimma University College of Agriculture and Veterinary Medicine Jimma,  
284 Ethiopia, for funding this research.

## 285 **Data Availability Statement**

286 All relevant data are within the paper.

## 287 **Competing Interests**

288 The authors have declared that no competing interests exist.

## 289 **Author Contributions**

290 Conceptualization: BD GB MM.

291 Formal analysis: BD MM.

292 Funding acquisition: GB.

293 Investigation: BD GB MM OH AN AN AH PS.

294 Methodology: BD MM.

295 Project administration: GB.

296 Resources: GB.

297 Writing original draft: BD.

298 Writing review & editing: BD.

299 **REFERENCES**

- 300 1. Abedi T, Alemzadeh A, Kazemeini SA. Effect of organic and inorganic fertilizers on  
301 grain yield and protein banding pattern of wheat. Australian journal of crop science.  
302 2010;4(6):384-89.
- 303 2. Estrada-Campuzano G, Slafer GA, Miralles DJ. Differences in yield, biomass and  
304 their components between triticale and wheat grown under contrasting water and  
305 nitrogen environments. Field Crops Research. 2012;128:167-79.
- 306 3. Agegnehu G, Amede T. Integrated soil fertility and plant nutrient management in  
307 tropical agro-ecosystems: a review. Pedosphere. 2017; 27(4):662-80.
- 308 4. Efthimiadou A, Bilalis D, Karkanis A, Froud-Williams B. Combined  
309 organic/inorganic fertilization enhance soil quality and increased yield,  
310 photosynthesis and sustainability of sweet maize crop. Australian Journal of Crop  
311 Science. 2010;4(9):722-29.
- 312 5. Manna MC, Swarup A, Wanjari RH, Ravankar HN, Mishra B, Saha MN, Singh YV,  
313 Sahi DK, Sarap PA. Long-term effect of fertilizer and manure application on soil  
314 organic carbon storage, soil quality and yield sustainability under sub-humid and  
315 semi-arid tropical India. Field crops research. 2005;14;93(2-3):264-80.

- 316 6. Kaur T, Brar BS, Dhillon NS. Soil organic matter dynamics as affected by long-term  
317 use of organic and inorganic fertilizers under maize-wheat cropping system.  
318 Nutrient Cycling in Agroecosystems. 2008 ;81(1):59-69.
- 319 7. Sarwar G, Schmeisky H, Hussain N, Muhammad S, Ibrahim M, Safdar E.  
320 Improvement of soil physical and chemical properties with compost application in  
321 rice-wheat cropping system. Pakistan Journal of Botany. 2008;40(1):275-82.
- 322 8. Merete W, Haddis A, Alemayehu E, Ambelu A. The potential of coffee husk and  
323 pulp as an alternative source of environmentally friendly energy. East African  
324 Journal of Sciences. 2014;8(1):29-36.
- 325 9. WRB I. Working Group (2006) World reference base for soil resources. A framework  
326 for international classification, correlation and communication, 2nd edn (World Soil  
327 Resources Reports 103). Food and Agriculture Organization of the United Nations,  
328 Rome.
- 329 10. van Reeuwijk LP. Procedures for soil analysis. ISRIC, Wageningen, the Netherlands.  
330 Procedures for soil analysis. 3rd ed. ISRIC, Wageningen, the Netherlands.. 1992.
- 331 11. Shaheen SM, Tsadilas CD, Eskridge KM. Effect of common ions on phosphorus  
332 sorption and lability in Greek Alfisols with different pH. Soil Science. 2009;174(1):21-  
333 6.
- 334 12. Liu D, Shi Y. Effects of different nitrogen fertilizer on quality and yield in winter  
335 wheat. Advance Journal of Food Science and Technology. 2013;5(5):646-9.

- 336 13. Miller RO, Kalra YP. Handbook of reference methods for plant analysis. Handbook  
337 of reference methods for plant analysis. 1998;38:57-62.
- 338 14. Dzung NA, Dzung TT, Khanh VT. Evaluation of coffee husk compost for improving  
339 soil fertility and sustainable coffee production in rural central highland of Vietnam.  
340 Resources and Environment. 2013;3(4):77-82.
- 341 15. Kandil AA, El-Hindi MH, Badawi MA, El-Morarsy SA, Kalboush FA. Response of  
342 wheat to rates of nitrogen, biofertilizers and land leveling. Crop & Enviro.  
343 2011;2(1):46-51.
- 344 16. Moe K, Mg KW, Win KK, Yamakawa T. Effects of combined application of inorganic  
345 fertilizer and organic manures on nitrogen use and recovery efficiencies of hybrid  
346 rice (Palethwe-1). American Journal of Plant Sciences. 2017;8(05):1043.
- 347 17. Kaur T, Brar BS, Dhillon NS. Soil organic matter dynamics as affected by long-term  
348 use of organic and inorganic fertilizers under maize–wheat cropping system.  
349 Nutrient Cycling in Agroecosystems. 2008;81(1):59-69.
- 350 18. Sarwar G, Schmeisky H, Hussain N, Muhammad S, Ibrahim M, Safdar E.  
351 Improvement of soil physical and chemical properties with compost application in  
352 rice-wheat cropping system. Pakistan Journal of Botany. 2008;40(1):275-82.
- 353 19. Rasool R, Kukal SS, Hira GS. Soil physical fertility and crop performance as affected  
354 by long term application of FYM and inorganic fertilizers in rice–wheat system. Soil  
355 and Tillage research. 2007;96(1-2):64-72.

- 356 20. Singh Brar B, Singh J, Singh G, Kaur G. Soil organic carbon and physical properties  
357 as affected by long-term application of FYM and inorganic fertilizers in maize–  
358 wheat system. *Soil & Tillage Research*. 2008;101:31-6.
- 359 21. Singh Brar B, Singh J, Singh G, Kaur G. Effects of long term application of inorganic  
360 and organic fertilizers on soil organic carbon and physical properties in maize–  
361 wheat rotation. *Agronomy*. 2015;5(2):220-38.
- 362 22. Diacono M, Rubino P, Montemurro F. Precision nitrogen management of wheat. A  
363 review. *Agronomy for Sustainable Development*. 2013;33(1):219-41.
- 364
- 365
- 366
